# Supplementary material for: Rapid nongenomic estrogen signaling controls alcohol drinking behavior in mice
Source: PubMed Central journal article supplement (PMC11686278; doi:10.1038/s41467-024-54737-6), 2024-12-30
Supplement: 41467_2024_54737_MOESM2_ESM.pdf [file 41467_2024_54737_MOESM2_ESM.pdf]

## Rapid nongenomic estrogen signaling controls alcohol drinking behavior in mice

Corresponding Author: Dr Kristen Pleil

This manuscript has been previously reviewed at another journal. This document only contains information relating to versions considered at Nature Communications.

**This file contains all reviewer reports in order by version, followed by all author rebuttals in order by version.**

Version 0:

Reviewer comments:

Reviewer #2

(Remarks to the Author)

The authors have addressed my main concerns in the revised manuscript with the addition of experiments that demonstrate that intra-BNST infusion of letrozole in female mice does not affect ethanol consumption and that systemic injection of letrozole in male mice does not affect ethanol consumption. These results support their conclusions that ovarian-derived E2 promotes binge ethanol consumption through rapid signaling mechanisms in the BNST. I also appreciate the other changes that the authors made referencing additional papers and more precisely stating the conclusions and implications of their findings. My only request is that the experiment with systemic letrozole treatment in male mice be added to Extended data Fig. 5 (related to Fig. 4).

(Remarks on code availability)

Reviewer #3

(Remarks to the Author)

In the manuscript by Zallar et al., the authors present original and novel results. There is a large amount of work showing that females have elevated alcohol intake and that estrogen is involved in this effect. This study, however, is the first to strategically monitor, classify these estrogen states (low, high), and then investigate the brain region (BNST), cell type (CRF), and signaling cascades associated (ER $\alpha$ , non-genomic mechanism). Understanding these sex effects in alcohol consumption are critically important to the field and this work will help guide future work in this area. The experiments have been well-designed and appropriately analyzed. The authors were very responsive to the original reviews and addressed the previous concerns with new experiments, reduced emphasis on the DREADD experiments, and re-framing of interpretations. These changes have greatly improved the manuscript and there are no further concerns.

(Remarks on code availability)

**Open Access** This Peer Review File is licensed under a Creative Commons Attribution 4.0 International License, which permits use, sharing, adaptation, distribution and reproduction in any medium or format, as long as you give appropriate credit to the original author(s) and the source, provide a link to the Creative Commons license, and indicate if changes were made.

In cases where reviewers are anonymous, credit should be given to 'Anonymous Referee' and the source.

The images or other third party material in this Peer Review File are included in the article's Creative Commons license, unless indicated otherwise in a credit line to the material. If material is not included in the article's Creative Commons license and your intended use is not permitted by statutory regulation or exceeds the permitted use, you will need to obtain permission directly from the copyright holder.

To view a copy of this license, visit <https://creativecommons.org/licenses/by/4.0/>
